# Supplementary material for: Reaching the Monophyly: Re-Evaluation of the Enigmatic Species Tenuibiotus hyperonyx (Maucci, 1983) and the Genus Tenuibiotus (Eutardigrada)
Source: MDPI journal article supplement (doi:10.3390/ani12030404), 2022-02-08
Supplement: s1 [file s1]

## BI tree:

(((((Ber\_neb:0.08869178999999994,Ber\_vol:0.07073977000000009):0.5465504999999999,Eoh\_nad:0.32056009999999998):0.30051939999999977,(Ram\_sub:1.232505,Hyp\_exe:1.426674):0.2303255000000018):0.1141553,((((Ado\_cf\_gra\_JP008\_H1:9.7690950000000672E-4,Ado\_cf\_gra\_JP008\_H2:5.242566000001059E-4):0.26807620000000001,(Ado\_gra\_1:0.023543440000000082,Ado\_gra\_2:0.023608850000000015):0.037348020000000004):0.112900200000000012,(((Cre\_cre\_NO417:0.27154269999999999,(Cre\_sp\_GB108\_H1:0.0014984160000000024,Cre\_sp\_GB108\_H2:0.001925616999999935):0.06213134000000009):0.024910900000000007,(Cre\_sp\_GL\_001\_1:2.2864249999998698E-4,Cre\_sp\_GL\_001\_2:2.2684899999991792E-4):0.080207410000000009):0.2801247,(Cre\_ruh\_1:2.676617999999298E-4,Cre\_ruh\_2:6.885948999999503E-4,Cre\_ruh\_3:2.68334600000008635E-4):0.23734309999999992):0.138136900000000012):0.2104705,((((Dac\_amb\_1:0.021100420000000001,Dac\_amb\_2:0.05049025999999999):0.050034300000000009,Dac\_oct:0.020836269999999999,((Dac\_par\_FR:2.68683200000006385E-4,(Dac\_par\_PL\_H1:2.54002399999953E-4,Dac\_par\_PL\_H2:6.1475640000000827E-4):0.0018367200000000014):0.0035443390000000063,Dac\_par\_GB:0.00121450400000000051):0.053064189999999956,Dac\_sel:0.09853460999999997):0.086294069999999989,Dac\_ovi:0.17834149999999993):0.10085999999999995,(Mur\_cf\_pul\_IT338:0.09093163999999998,Mur\_pul:0.02632181):0.12310749999999993):0.11742359999999996,Mur\_dia:0.7990218999999998):0.287978500000000014):0.098646719999999963,((((Dia\_isl\_IS042:0.15239139999999995,Dia\_sp\_NO386:0.19228299999999998):0.06684500999999998,Dia\_sp\_ID517:0.21057119999999996):0.07925399,((Ten\_hyp\_IT\_339:2.6211799999990897E-4,Ten\_hyp\_IT\_345:2.593849000001036E-4):6.0245390000000217E-4,(Ten\_hyp\_IT\_341:2.574051999999494E-4,Ten\_hyp\_IT\_344:2.61312899999977E-4):0.00160718700000000654):0.33269649999999995):0.12984529999999994,((((Ric\_aff\_cor\_GR008\_H1:0.001133480000000002,(Ric\_aff\_cor\_GR008\_H2:0.00199310100000000526,Ric\_aff\_cor\_GR008\_H3:0.002164983999999981):0.00156289600000000358):0.14362089999999994,((Ric\_aff\_cor\_IT317\_H1:9.6128480000000174E-4,Ric\_aff\_cor\_IT317\_H3:2.47761500000005437E-4):0.0048312770000000078,Ric\_aff\_cor\_IT317\_H2:0.003009891999999903):0.099571110000000007):0.070744820000000004,(Ric\_aff\_cor\_IT120:0.0035850969999999815,Ric\_aff\_cor\_PL246:0.001420886000000001):0.1379317):0.1642386,(Ric\_cor:0.169600500000000004,Ric\_zie:0.12399129999999992):0.264014100000000003):0.173578499999999986):0.21079779999999992):0.14502410000000001,(((Mac\_cae:0.3532411,Xer\_pse\_1:0.3109275):0.2655299,Mac\_sho:0.75068099999999999):0.4945094999999997,(Meb\_dil:1.0857,Meb\_har:1.1523849999999998):0.97800449999999999):0.116651700000000025,(((Min\_ioc:0.37831919999999997,Min\_pen:0.5318509):0.161556400000000004,(Ten\_vor:0.073145290000000003,Ten\_zan:0.0573085200000000085):0.4180739):0.103341600000000003,(Pam\_are:0.58242570000000002,Pam\_fai:0.64388739999999999):0.108611000000000001):0.30552519999999994):0.20927929999999995):0.11415529999999992),((((Ber\_neb:0.08869179,Ber\_vol:0.07073977):0.5465505,Eoh\_nad:0.3205601):0.3005194,(Ram\_sub:1.232505,Hyp\_exe:1.426674):0.2303255):0.1141553,((((Ado\_cf\_gra\_JP008\_H1:9.769095E-4,Ado\_cf\_gra\_JP008\_H2:5.242566E-4):0.2680762,(Ado\_gra\_1:0.02354344,Ado\_gra\_2:0.02360885):0.03734802):0.1129002,(((Cre\_cre\_NO417:0.2715427,(Cre\_sp\_GB108\_H1:0.001498416,Cre\_sp\_GB108\_H2:0.001925617):0.06213134):0.0249109,(Cre\_sp\_GL\_001\_1:2.286425E-4,Cre\_sp\_GL\_001\_2:2.26849E-4):0.08020741):0.2801247,(Cre\_ruh\_1:2.676618E-4,Cre\_ruh\_2:6.885949E-4,Cre\_ruh\_3:2.683346E-4):0.2373431):0.1381369):0.2104705,((((Dac\_amb\_1:0.02110042,Dac\_amb\_2:0.05049026):0.0500343,Dac\_oct:0.02083627,((Dac\_par\_FR:2.686832E-4,(Dac\_par\_PL\_H1:2.540024E-4,Dac\_par\_PL\_H2:6.147564E-

4):0.00183672):0.003544339,Dac\_par\_GB:0.001214504):0.05306419,Dac\_sel:0.09853461):0.086294  
07,Dac\_ovi:0.1783415):0.10086,(Mur\_cf\_pul\_IT338:0.09093164,Mur\_pul:0.02632181):0.1231075):0.  
1174236,Mur\_dia:0.7990219):0.2879785):0.09864672,((((Dia\_isl\_IS042:0.1523914,Dia\_sp\_NO386:0.  
192283):0.06684501,Dia\_sp\_ID517:0.2105712):0.07925399,((Ten\_hyp\_IT\_339:2.621118E-  
4,Ten\_hyp\_IT\_345:2.593849E-4):6.024539E-4,(Ten\_hyp\_IT\_341:2.574052E-  
4,Ten\_hyp\_IT\_344:2.613129E-  
4):0.001607187):0.3326965):0.1298453,((((Ric\_aff\_cor\_GR008\_H1:0.00113348,(Ric\_aff\_cor\_GR008\_  
H2:0.001993101,Ric\_aff\_cor\_GR008\_H3:0.002164984):0.001562896):0.1436209,((Ric\_aff\_cor\_IT317  
\_H1:9.612848E-4,Ric\_aff\_cor\_IT317\_H3:2.477615E-  
4):0.004831277,Ric\_aff\_cor\_IT317\_H2:0.003009892):0.09957111):0.07074482,(Ric\_aff\_cor\_IT120:0.  
003585097,Ric\_aff\_cor\_PL246:0.001420886):0.1379317):0.1642386,(Ric\_cor:0.1696005,Ric\_zie:0.12  
39913):0.2640141):0.1735785):0.2107978):0.1450241,((((Mac\_cae:0.3532411,Xer\_pse\_1:0.3109275)  
:0.2655299,Mac\_sho:0.750681):0.4945095,(Meb\_dil:1.0857,Meb\_har:1.152385):0.9780045):0.11665  
17,(((Min\_ioc:0.3783192,Min\_pen:0.5318509):0.1615564,(Ten\_vor:0.07314529,Ten\_zan:0.05730852  
):0.4180739):0.1033416,(Pam\_are:0.5824257,Pam\_fai:0.6438874):0.108611):0.3055252):0.2092793)  
:0.1141553);

#### ML tree:

((Eoh\_nad:0.14741491773838766,(Ber\_neb:0.027783465975382837,Ber\_vol:0.0213572786880354  
97):0.25920330752230014):0.1486750797363472,(Ram\_sub:0.6349283436079489,Hyp\_exe:0.76153  
51636230866):0.10315878834642112):0.055572024046004205,((((Ado\_gra\_1:1.000000500073206  
E-6,Ado\_gra\_2:1.000000500073206E-6):1.0000004999621837E-  
6,(Ado\_cf\_gra\_JP008\_H1:0.0012112060928030077,Ado\_cf\_gra\_JP008\_H2:2.3308788930587188E-  
4):0.1504980955661298):0.05279468921168551,((Cre\_ruh\_2:7.679249253188525E-  
4,(Cre\_ruh\_3:1.000000500073206E-6,Cre\_ruh\_1:1.000000500073206E-6):1.000000500073206E-  
6):0.15890658126046076,(Cre\_cre\_NO417:0.1495223606917968,((Cre\_sp\_GB108\_H2:0.0035174696  
029665053,Cre\_sp\_GB108\_H1:0.0013663176568976532):0.04301134857936406,(Cre\_sp\_GL\_001\_1:  
1.000000500073206E-6,Cre\_sp\_GL\_001\_2:1.000000500073206E-  
6):0.05054274216092336):0.010460858709026355):0.13163984209499602):0.06882354111937983)  
:0.10455883287173329,(Mur\_dia:0.38317013400081135,((Dac\_ovi:0.11216828288997016,((Dac\_pa  
r\_GB:1.000000500073206E-  
6,((((Dac\_amb\_2:0.012843924812830365,Dac\_amb\_1:1.000000500073206E-  
6):0.012851007862592412,Dac\_par\_PL\_H2:1.000000500073206E-6):6.576281490285885E-  
4,Dac\_par\_PL\_H1:1.000000500073206E-6):1.000000500073206E-6,Dac\_oct:1.000000500073206E-  
6):0.002712401198256442,Dac\_par\_FR:1.000000500073206E-  
6):0.006881772500100025):0.042713239747613985,Dac\_sel:0.07973693515003366):0.0497434608  
2891001):0.047450612481807486,(Mur\_pul:1.000000500073206E-  
6,Mur\_cf\_pul\_IT338:0.029563762284088746):0.09044423872931595):0.054499809047360626):0.13  
989312388124453):0.04581235279039375,((((Ten\_hyp\_IT\_341:1.000000500073206E-  
6,Ten\_hyp\_IT\_344:1.000000500073206E-  
6):0.0025526322146107727,(Ten\_hyp\_IT\_345:1.000000500073206E-  
6,Ten\_hyp\_IT\_339:1.000000500073206E-6):1.000000500073206E-  
6):0.17819268254563525,((Dia\_sp\_NO386:0.10147353295962913,Dia\_isl\_IS042:0.08817777368936  
841):0.034134312360666996,Dia\_sp\_ID517:0.12245477743392597):0.03603179428561898):0.0622  
692069681543,(((Ric\_aff\_cor\_PL246:0.0014719760653552072,Ric\_aff\_cor\_IT120:0.00553398992046  
4055):0.07880732374110233,(((Ric\_aff\_cor\_IT317\_H1:0.0012320728867720732,Ric\_aff\_cor\_IT317\_

H3:1.000000500073206E-

6):0.006578010801883694,Ric\_aff\_cor\_IT317\_H2:0.004287402245703231):0.054851042495164704,  
(Ric\_aff\_cor\_GR008\_H1:1.000000500073206E-  
6,(Ric\_aff\_cor\_GR008\_H2:0.0030938106455011827,Ric\_aff\_cor\_GR008\_H3:0.003155418133578447)  
:0.0031000135565417697):0.07555680808492737):0.03981379117080053):0.07609518090173484,(  
Ric\_cor:0.09274697628387285,Ric\_zie:0.07573240280267657):0.14150369313478328):0.086849341  
0860457):0.0955259643369164):0.05942914623569795,(((Min\_pen:0.2904219813409984,Min\_ioc:0  
.18233803983758368):0.07062038471148069,((Pam\_fai:0.3150123360692493,Pam\_are:0.28874578  
692612274):0.06126574507573934,(Ten\_zan:0.035696219183018685,Ten\_vor:0.045160566972080  
82):0.21607945260335193):0.030400666130638188):0.13927310796167336,((Mac\_sho:0.37536182  
97584308,(Mac\_cae:0.19635232379646272,Xer\_pse\_1:0.18358115411591858):0.125318018717072  
6):0.2437870266640484,(Meb\_har:0.5806984318118116,Meb\_dil:0.576782267535227):0.49461760  
252343523):0.04353351392911975):0.09709932897924078):0.05557202404600408);
