# Supplementary material for: Reaching the Monophyly: Re-Evaluation of the Enigmatic Species Tenuibiotus hyperonyx (Maucci, 1983) and the Genus Tenuibiotus (Eutardigrada)
Source: MDPI journal article supplement (doi:10.3390/ani12030404), 2022-02-08
Supplement: s1 [file s1]

## BI:

### Settings used

alignment : .\18S\_28S\_COI\_ITS2.phy

branchlengths : linked

models : JC, K80, SYM, F81, HKY, GTR, JC+G, K80+G, SYM+G, F81+G, HKY+G, GTR+G, JC+I, K80+I, SYM+I, F81+I, HKY+I, GTR+I, JC+I+G, K80+I+G, SYM+I+G, F81+I+G, HKY+I+G, GTR+I+G

model\_selection : bic

search : greedy

### Best partitioning scheme

Scheme Name : start\_scheme

Scheme lnL : -27683.3265991

Scheme BIC : 56601.7748511

Number of params : 154

Number of sites : 3042

Number of subsets : 6

| Subset | Best Model | # sites | subset id                        | Partition names |
|--------|------------|---------|----------------------------------|-----------------|
| 1      | SYM+I+G    | 1009    | dbb1f009713256a64f462726a798bb1a | 18S             |
| 2      | SYM+G      | 832     | c729b917f2760198563c64c7ad1a18e0 | 28S             |
| 3      | HKY+G      | 220     | 68cb7022a49e378ae32b5449767de049 | COI_pos2        |
| 4      | SYM+I+G    | 219     | bd8c5da9f24caf3f895ae5efeece8d69 | COI_pos3        |
| 5      | GTR+I+G    | 219     | 96289259977b5b0f7ffd7a1547dab639 | COI_pos1        |
| 6      | K80+I+G    | 543     | 50502d25058bd24193dccfc87b432c53 | ITS2            |

## ML:

### Scheme BIC for different GTR models:

GTR 60167.5709396

GTR+G 56766.7606776

GTR+I 57932.8285487

GTR+I+G 56700.1250983
